# Supplementary figures and images for: Detection of Tioman Virus in Pteropus vampyrus Near Flores, Indonesia
Source: MDPI journal article supplement (doi:10.3390/v13040563), 2021-03-26

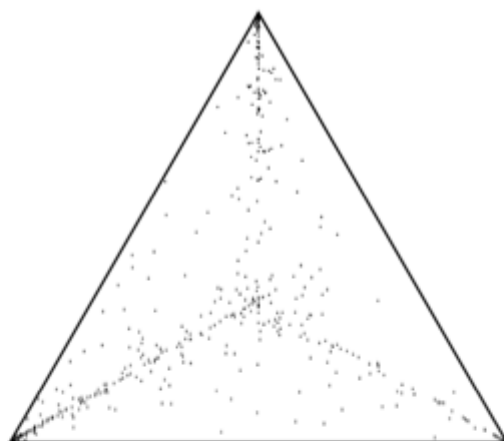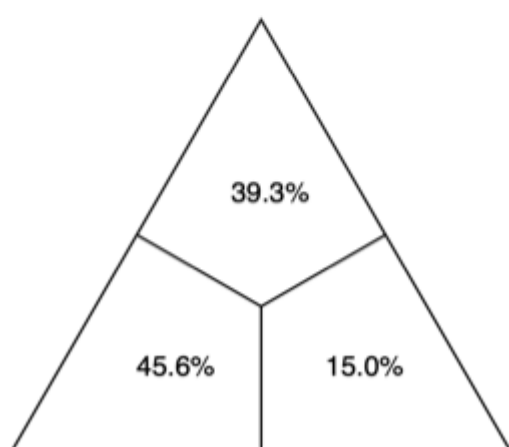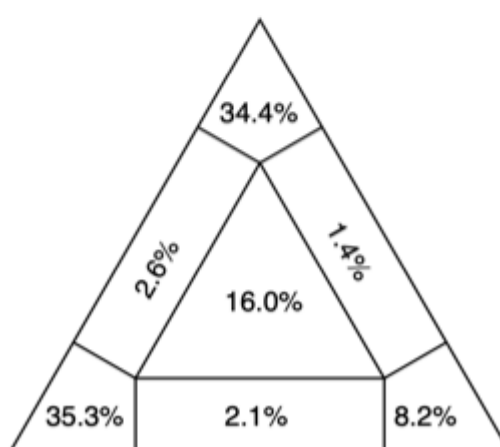

Supplement: s1 [file s1]
